# Supplementary material
Source: PubMed Central journal article supplement (PMC1564215)

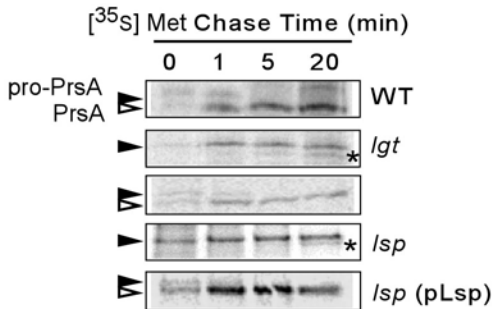

Supplement: pnas_0603072103_3.pdf [file pnas_0603072103_3.pdf]

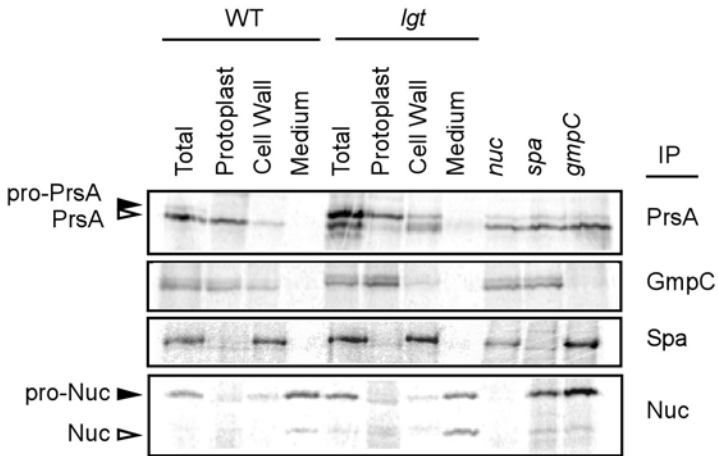

Supplement: pnas_0603072103_4.pdf [file pnas_0603072103_4.pdf]

**A**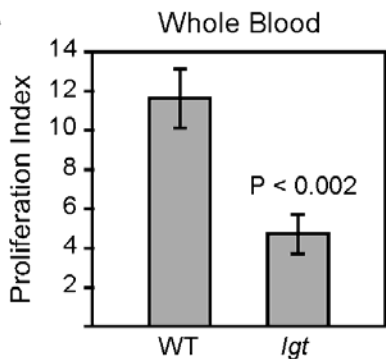**B**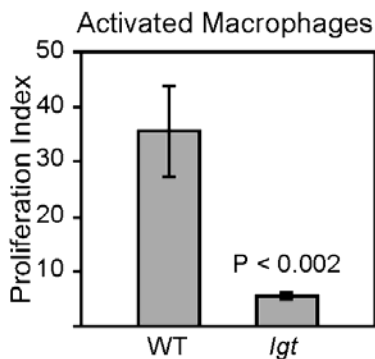**C**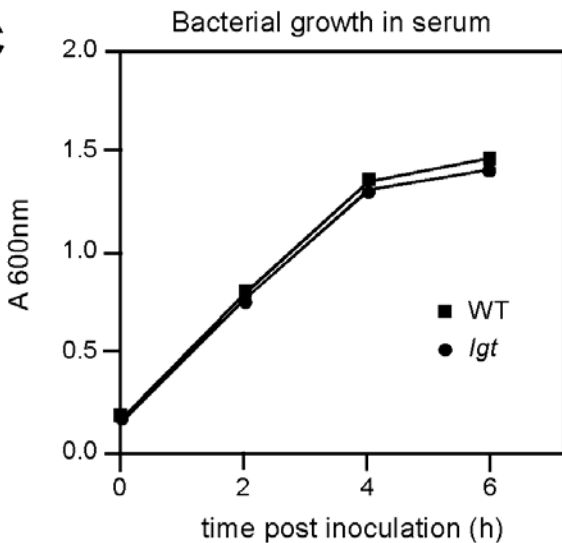

Supplement: pnas_0603072103_5.pdf [file pnas_0603072103_5.pdf]
